# Supplementary material for: Detection and characterization of the SARS-CoV-2 lineage B.1.526 in New York
Source: PubMed Central journal article supplement (PMC8352861; doi:10.1038/s41467-021-25168-4), 2021-08-09
Supplement: 41467_2021_25168_MOESM1_ESM.pdf [file 41467_2021_25168_MOESM1_ESM.pdf]

Supplementary Information for

Detection and characterization of the SARS-CoV-2 lineage B.1.526 in New York

Anthony P. West, Jr.<sup>1\*</sup>, Joel O. Wertheim<sup>2</sup>, Jade C. Wang<sup>3</sup>, Tetyana I. Vasylyeva<sup>2</sup>, Jennifer L. Havens<sup>4</sup>, Moinuddin A. Chowdhury<sup>3</sup>, Edimarlyn Gonzalez<sup>3</sup>, Courtney E. Fang<sup>3</sup>, Steve S. Di Lonardo<sup>3</sup>, Scott Hughes<sup>3</sup>, Jennifer L. Rakeman<sup>3</sup>, Henry H. Lee<sup>5,6</sup>, Christopher O. Barnes<sup>1</sup>, Priyanthi N. P. Gnanapragasam<sup>1</sup>, Zhi Yang<sup>1</sup>, Christian Gaebler<sup>7</sup>, Marina Caskey<sup>7</sup>, Michel C. Nussenzweig<sup>7,8</sup>, Jennifer R. Keeffe<sup>1</sup>, Pamela J. Bjorkman<sup>1</sup>

<sup>1</sup>Division of Biology and Biological Engineering, California Institute of Technology, Pasadena, CA 91125, USA.

<sup>2</sup>Department of Medicine, University of California San Diego, La Jolla, CA 92093

<sup>3</sup>New York City Public Health Laboratory, New York City Department of Health and Mental Hygiene, New York, NY, 10016 USA

<sup>4</sup>Bioinformatics and Systems Biology Graduate Program, University of California San Diego, La Jolla, CA 92093

<sup>5</sup>Pandemic Response Laboratory, Long Island City, NY 11101

<sup>6</sup>Department of Genetics, Harvard Medical School, Boston, MA 02115

<sup>7</sup>Laboratory of Molecular Immunology, The Rockefeller University, New York, NY 10065, USA.

<sup>8</sup>Howard Hughes Medical Institute, The Rockefeller University, New York, NY, 10065 USA.

\*Corresponding author: Anthony P. West, Jr., [apwest@caltech.edu](mailto:apwest@caltech.edu)

## Supplementary Methods.

Commands for the program **vdb**, implementing a mutation pattern query language:

### Notation

cluster = group of viruses      < > = user input      n = an integer  
pattern = group of mutations    [ ] = optional      ( ) = explanation of command  
"world" = all viruses in database    -> result

To define a variable for a cluster or pattern: <name> = cluster or pattern

Set operations +, -, and \* (intersection) can be applied to clusters or patterns

If no cluster is entered, all viruses will be used ("world")

### Filter commands

<cluster> from <country or state>      -> cluster  
<cluster> containing [<n>] <pattern>      -> cluster alias with (matches for >=n mutations)  
<cluster> not containing <pattern>      -> cluster alias without (considers whole pattern)  
<cluster> before <date>      -> cluster  
<cluster> after <date>      -> cluster  
<cluster> > or <n>      -> cluster (filter by number of mutations)

### Commands to find mutation patterns

consensus [for] <cluster or country or state>      -> pattern  
patterns [in] [<n>] <cluster>      -> pattern (lists n patterns)

### Listing commands

list [<n>] <cluster>  
[list] countries [for] <cluster>  
[list] states [for] <cluster>  
[list] frequencies [for] <cluster> alias freq (frequency of individual mutations)  
[list] monthly [for] <cluster> [<cluster2>] (number of viruses per month or week)  
[list] weekly [for] <cluster> [<cluster2>] (as a fraction of number of viruses in cluster2)  
[list] patterns (list built-in and user-defined patterns)  
[list] clusters (list built-in and user-defined clusters)

### Other commands

sort <cluster> (by date)  
help  
history  
quit

Supplementary Fig. 1.

Phylogenetic tree of lineage B.1.526 indicating spike mutations. The inset lists non-spike

mutations common in this lineage.

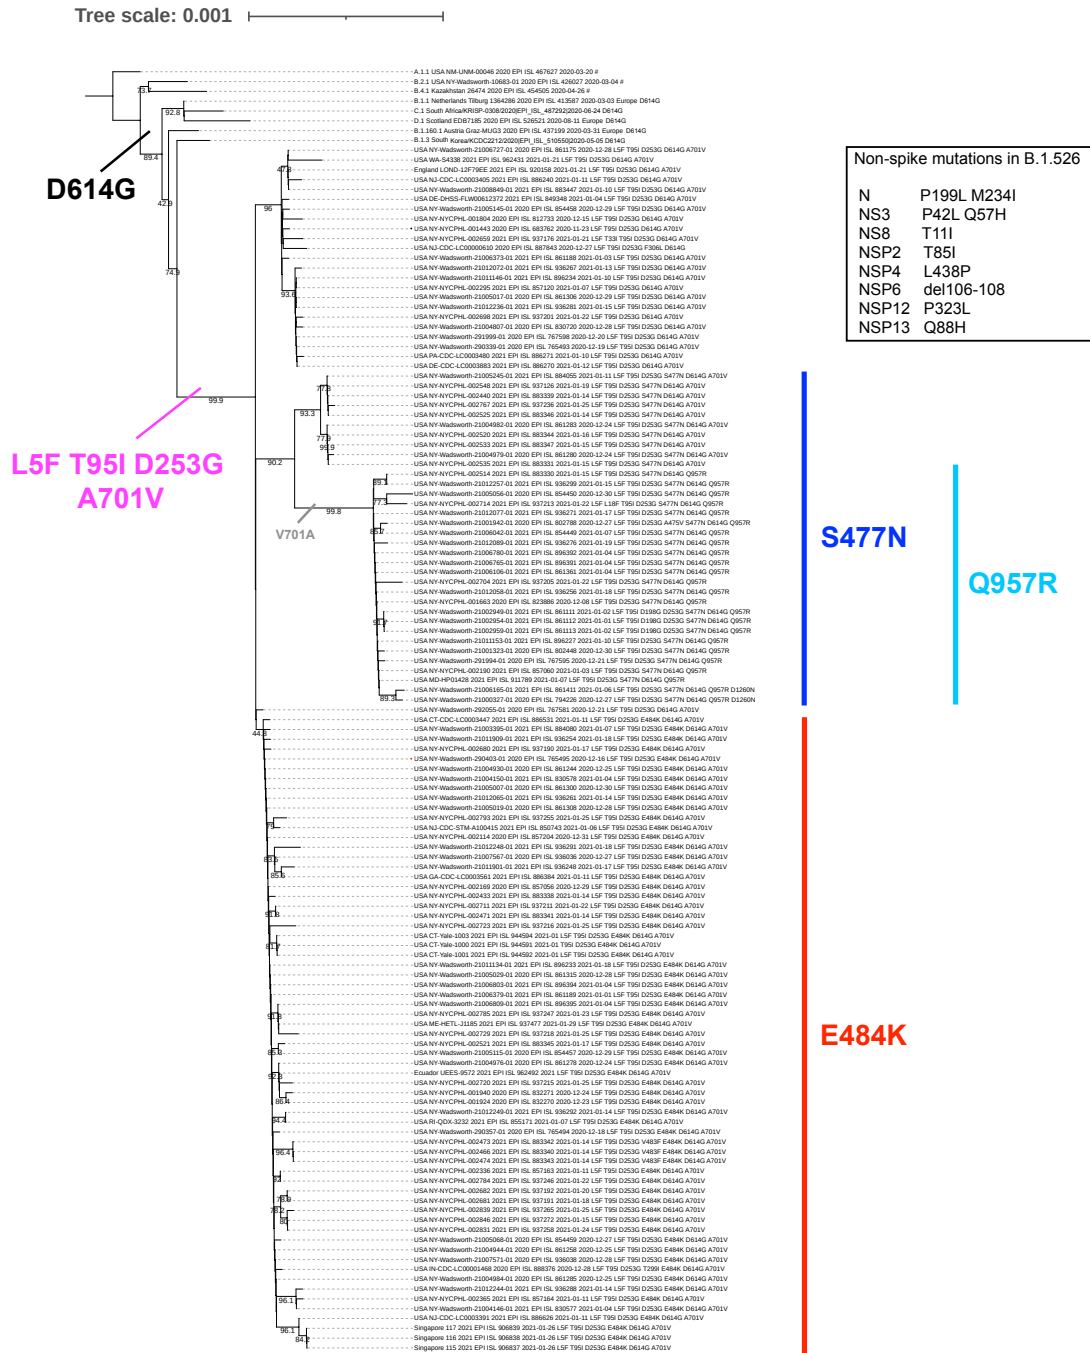

Supplementary Fig. 2.

Maximum likelihood phylogenetic tree of the B.1.526 lineage (including B.1.526.2) in relation to a sister clade defined by an L452R spike mutation (including B.1.526.1, shown in orange) and the 20C ancestral virus (shown in gray). Tree was rooted using the clade 20C ancestral viruses sampled in NYC. Amino acid substitutions in the spike protein occurring on internal branches are labeled. The B.1.526 lineage is colored blue, except for the clade defined by the E484K mutation, which is highlighted in red.

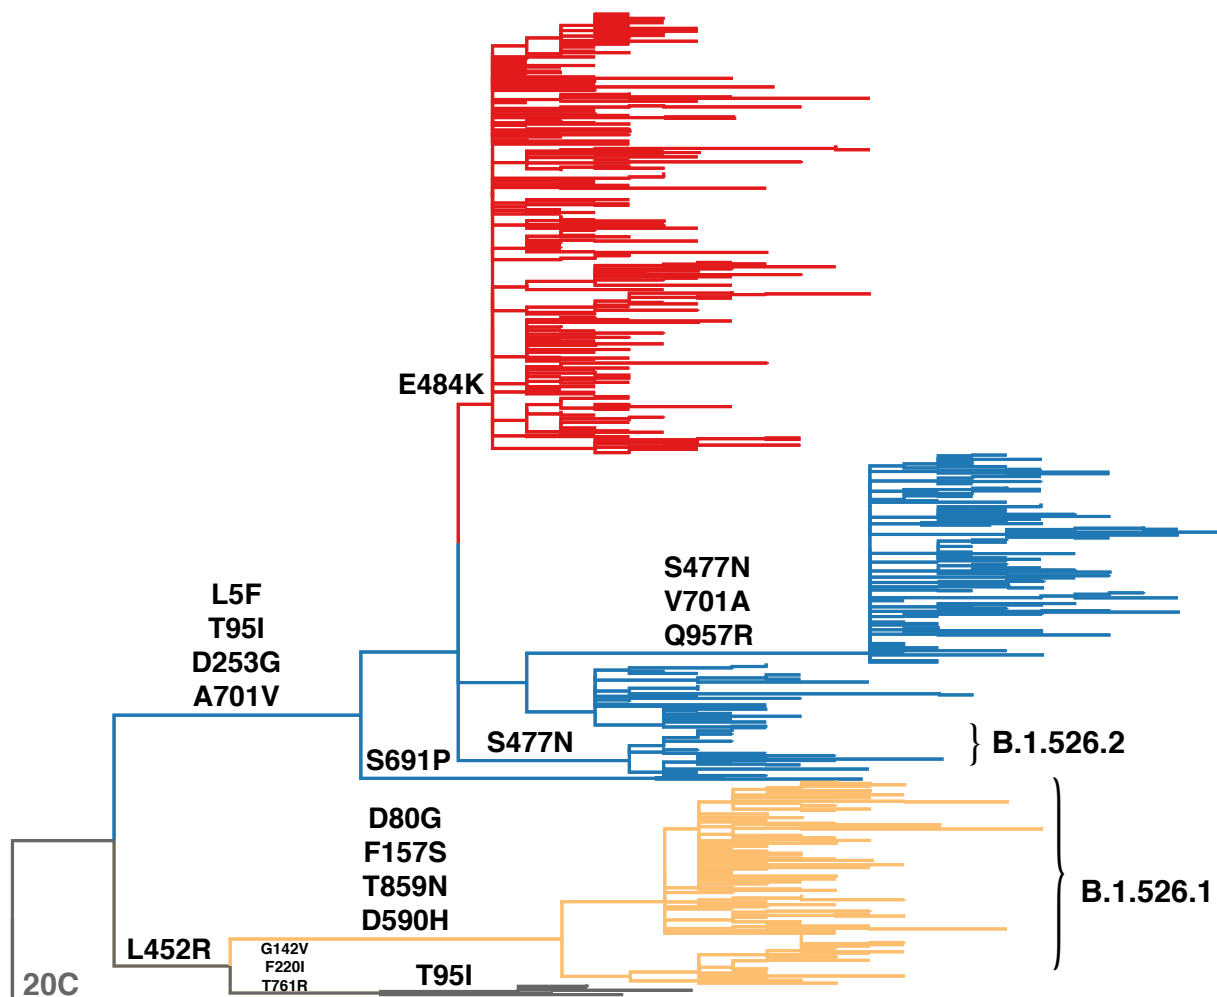

Supplementary Fig. 3.

Bayesian skyline demographic reconstruction and time of most recent common ancestor (TMRCA) inference for SARS-CoV-2 variants in New York City, sampled December 2020 through April 2021. Thick solid lines represent the median estimate of the effective population size over time for each variant, the thinner solid lines represent the 95% Highest Posterior Density (HPD) intervals. The grey shaded areas represent the 95% HPD for the estimated TMRCA, the solid grey lines represent the median estimated TMRCA values. B.1.526 (E484) estimate includes B.1.526.2 subclade.

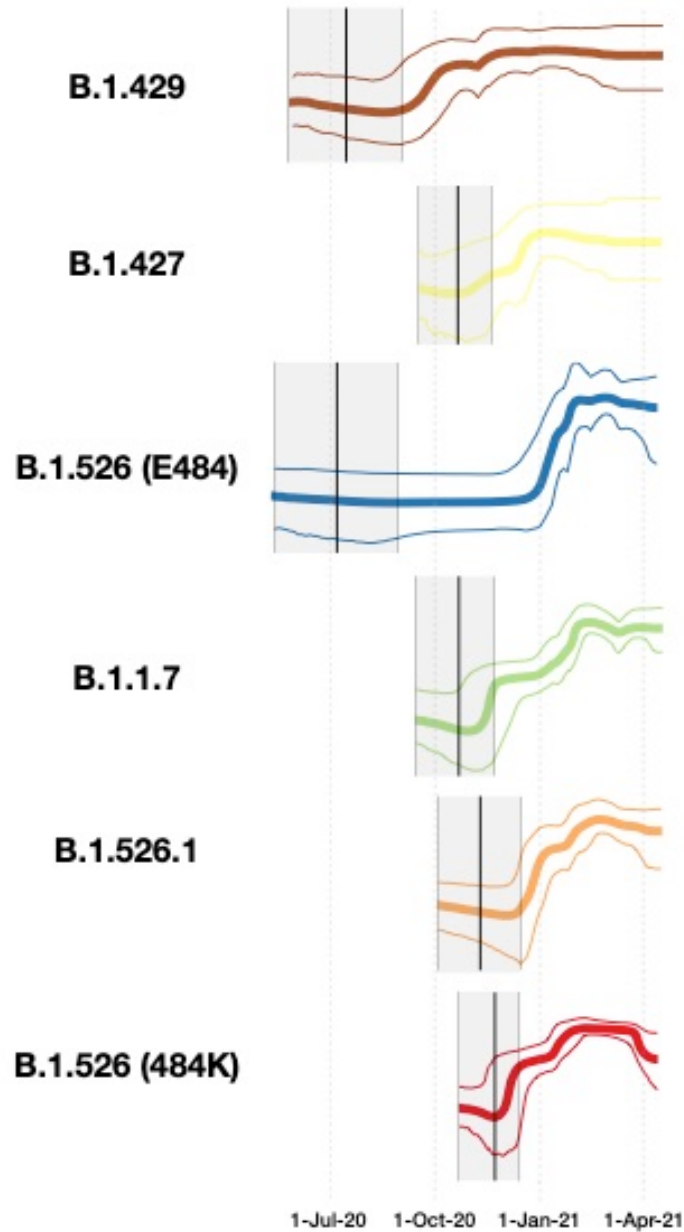

Supplementary Fig. 4.

Vaccinee plasma neutralizing activity against pseudoviruses with B.1.351 lineage spike mutations or D614G wildtype. SARS-CoV-2 pseudovirus neutralization assays were used to determine neutralization titer (NT50) for COVID-19 vaccinee plasma (n=10). B.1.351 pseudovirus containing spike mutations L18F, D80A, D215G,  $\Delta$ 242-244, R246I, K417N, E484K, N501Y, D614G, and A701V. Statistical significance was determined using paired two-tailed *t*-tests. Fold-difference of means is shown.

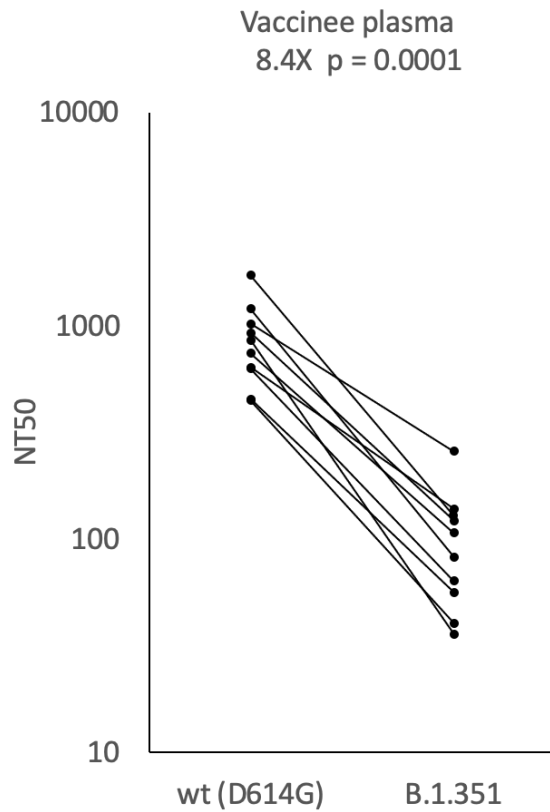

## Supplementary Table 1.

List of 124 viral genomes (with their accession number, location, collection date, and spike mutations) in lineage B.1.526. Mutations E484K, S477N, Q957R are highlighted in red, blue, and cyan, respectively.

EPI\_ISL\_683762, USA/NY-NYCPHL-001443/2020-11-23 : L5F T95I D253G D614G A701V  
EPI\_ISL\_823886, USA/NY-NYCPHL-001663/2020-12-08 : L5F T95I D253G S477N D614G Q957R  
EPI\_ISL\_812733, USA/NY-NYCPHL-001804/2020-12-15 : L5F T95I D253G D614G A701V  
EPI\_ISL\_765495, USA/NY-Wadsworth-290403-01/2020-12-16 : L5F T95I D253G E484K D614G A701V  
EPI\_ISL\_765494, USA/NY-Wadsworth-290357-01/2020-12-18 : L5F T95I D253G E484K D614G A701V  
EPI\_ISL\_765493, USA/NY-Wadsworth-290339-01/2020-12-19 : L5F T95I D253G D614G A701V  
EPI\_ISL\_767598, USA/NY-Wadsworth-291999-01/2020-12-20 : L5F T95I D253G D614G A701V  
EPI\_ISL\_767581, USA/NY-Wadsworth-292055-01/2020-12-21 : L5F T95I D253G D614G A701V  
EPI\_ISL\_767595, USA/NY-Wadsworth-291994-01/2020-12-21 : L5F T95I D253G S477N D614G Q957R  
EPI\_ISL\_832270, USA/NY-NYCPHL-001924/2020-12-23 : L5F T95I D253G E484K D614G A701V  
EPI\_ISL\_832271, USA/NY-NYCPHL-001940/2020-12-24 : L5F T95I D253G E484K D614G A701V  
EPI\_ISL\_861278, USA/NY-Wadsworth-21004976-01/2020-12-24 : L5F T95I D253G E484K D614G A701V  
EPI\_ISL\_861280, USA/NY-Wadsworth-21004979-01/2020-12-24 : L5F T95I D253G S477N D614G A701V  
EPI\_ISL\_861283, USA/NY-Wadsworth-21004982-01/2020-12-24 : L5F T95I D253G S477N D614G A701V  
EPI\_ISL\_861258, USA/NY-Wadsworth-21004944-01/2020-12-25 : L5F T95I D253G E484K D614G A701V  
EPI\_ISL\_861285, USA/NY-Wadsworth-21004984-01/2020-12-25 : L5F T95I D253G E484K D614G A701V  
EPI\_ISL\_861244, USA/NY-Wadsworth-21004930-01/2020-12-25 : L5F T95I D253G E484K D614G A701V  
EPI\_ISL\_802788, USA/NY-Wadsworth-21001942-01/2020-12-27 : L5F T95I D253G A475V S477N D614G Q957R  
EPI\_ISL\_794226, USA/NY-Wadsworth-21000327-01/2020-12-27 : L5F T95I D253G S477N D614G Q957R D1260N  
EPI\_ISL\_936036, USA/NY-Wadsworth-21007567-01/2020-12-27 : L5F T95I D253G E484K D614G A701V  
EPI\_ISL\_854459, USA/NY-Wadsworth-21005068-01/2020-12-27 : L5F T95I D253G E484K D614G A701V  
EPI\_ISL\_887843, USA/NJ-CDC-LC00000610/2020-12-27 : L5F T95I D253G F306L D614G  
EPI\_ISL\_861315, USA/NY-Wadsworth-21005029-01/2020-12-28 : L5F T95I D253G E484K D614G A701V  
EPI\_ISL\_888376, USA/IN-CDC-LC00001468/2020-12-28 : L5F T95I D253G T299I E484K D614G A701V  
EPI\_ISL\_830720, USA/NY-Wadsworth-21004807-01/2020-12-28 : L5F T95I D253G D614G A701V  
EPI\_ISL\_861308, USA/NY-Wadsworth-21005019-01/2020-12-28 : L5F T95I D253G E484K D614G A701V  
EPI\_ISL\_861175, USA/NY-Wadsworth-21006727-01/2020-12-28 : L5F T95I D253G D614G A701V  
EPI\_ISL\_936038, USA/NY-Wadsworth-21007571-01/2020-12-28 : L5F T95I D253G E484K D614G A701V  
EPI\_ISL\_854458, USA/NY-Wadsworth-21005145-01/2020-12-29 : L5F T95I D253G D614G A701V  
EPI\_ISL\_854457, USA/NY-Wadsworth-21005115-01/2020-12-29 : L5F T95I D253G E484K D614G A701V  
EPI\_ISL\_857056, USA/NY-NYCPHL-002169/2020-12-29 : L5F T95I D253G E484K D614G A701V  
EPI\_ISL\_861306, USA/NY-Wadsworth-21005017-01/2020-12-29 : L5F T95I D253G D614G A701V  
EPI\_ISL\_802448, USA/NY-Wadsworth-21001323-01/2020-12-30 : L5F T95I D253G S477N D614G Q957R  
EPI\_ISL\_861300, USA/NY-Wadsworth-21005007-01/2020-12-30 : L5F T95I D253G E484K D614G A701V  
EPI\_ISL\_854450, USA/NY-Wadsworth-21005056-01/2020-12-30 : L5F T95I D253G S477N D614G Q957R  
EPI\_ISL\_857204, USA/NY-NYCPHL-002114/2020-12-31 : L5F T95I D253G E484K D614G A701V  
EPI\_ISL\_861112, USA/NY-Wadsworth-21002954-01/2021-01-01 : L5F T95I D198G D253G S477N D614G Q957R  
EPI\_ISL\_861189, USA/NY-Wadsworth-21006379-01/2021-01-01 : L5F T95I D253G E484K D614G A701V  
EPI\_ISL\_944591, USA/CT-Yale-1000/2021-01-01 : T95I D253G E484K D614G A701V  
EPI\_ISL\_944592, USA/CT-Yale-1001/2021-01-01 : L5F T95I D253G E484K D614G A701V  
EPI\_ISL\_944594, USA/CT-Yale-1003/2021-01-01 : L5F T95I D253G E484K D614G A701V

EPI\_ISL\_962492, Ecuador/UEES-9572/2021-01-01 : L5F T95I D253G E484K D614G A701V  
EPI\_ISL\_962493, Ecuador/UEES-9602/2021-01-01 : L5F T95I D253G E484K D614G A701V  
EPI\_ISL\_861113, USA/NY-Wadsworth-21002959-01/2021-01-02 : L5F T95I D198G D253G S477N D614G Q957R  
EPI\_ISL\_861111, USA/NY-Wadsworth-21002949-01/2021-01-02 : L5F T95I D198G D253G S477N D614G Q957R  
EPI\_ISL\_857060, USA/NY-NYCPHL-002190/2021-01-03 : L5F T95I D253G S477N D614G Q957R  
EPI\_ISL\_861188, USA/NY-Wadsworth-21006373-01/2021-01-03 : L5F T95I D253G D614G A701V  
EPI\_ISL\_896394, USA/NY-Wadsworth-21006803-01/2021-01-04 : L5F T95I D253G E484K D614G A701V  
EPI\_ISL\_849348, USA/DE-DHSS-FLW00612372/2021-01-04 : L5F T95I D253G D614G A701V  
EPI\_ISL\_896391, USA/NY-Wadsworth-21006765-01/2021-01-04 : L5F T95I D253G S477N D614G Q957R  
EPI\_ISL\_896392, USA/NY-Wadsworth-21006780-01/2021-01-04 : L5F T95I D253G S477N D614G Q957R  
EPI\_ISL\_830577, USA/NY-Wadsworth-21004146-01/2021-01-04 : L5F T95I D253G E484K D614G A701V  
EPI\_ISL\_896395, USA/NY-Wadsworth-21006809-01/2021-01-04 : L5F T95I D253G E484K D614G A701V  
EPI\_ISL\_861361, USA/NY-Wadsworth-21006106-01/2021-01-04 : L5F T95I D253G S477N D614G Q957R  
EPI\_ISL\_830578, USA/NY-Wadsworth-21004150-01/2021-01-04 : L5F T95I D253G E484K D614G A701V  
EPI\_ISL\_861411, USA/NY-Wadsworth-21006165-01/2021-01-06 : L5F T95I D253G S477N D614G Q957R D1260N  
EPI\_ISL\_850743, USA/NJ-CDC-STM-A100415/2021-01-06 : L5F T95I D253G E484K D614G A701V  
EPI\_ISL\_854449, USA/NY-Wadsworth-21006042-01/2021-01-07 : L5F T95I D253G S477N D614G Q957R  
EPI\_ISL\_911789, USA/MD-HP01428/2021-01-07 : L5F T95I D253G S477N D614G Q957R  
EPI\_ISL\_857120, USA/NY-NYCPHL-002295/2021-01-07 : L5F T95I D253G D614G A701V  
EPI\_ISL\_855171, USA/RI-QDX-3232/2021-01-07 : L5F T95I D253G E484K D614G A701V  
EPI\_ISL\_884080, USA/NY-Wadsworth-21003395-01/2021-01-07 : L5F T95I D253G E484K D614G A701V  
EPI\_ISL\_896234, USA/NY-Wadsworth-21011146-01/2021-01-10 : L5F T95I D253G D614G A701V  
EPI\_ISL\_883447, USA/NY-Wadsworth-21008849-01/2021-01-10 : L5F T95I D253G D614G A701V  
EPI\_ISL\_896227, USA/NY-Wadsworth-21011153-01/2021-01-10 : L5F T95I D253G S477N D614G Q957R  
EPI\_ISL\_886271, USA/PA-CDC-LC0003480/2021-01-10 : L5F T95I D253G D614G A701V  
EPI\_ISL\_886626, USA/NJ-CDC-LC0003391/2021-01-11 : L5F T95I D253G E484K D614G A701V  
EPI\_ISL\_857164, USA/NY-NYCPHL-002365/2021-01-11 : L5F T95I D253G E484K D614G A701V  
EPI\_ISL\_886531, USA/CT-CDC-LC0003447/2021-01-11 : L5F T95I D253G E484K D614G A701V  
EPI\_ISL\_857163, USA/NY-NYCPHL-002336/2021-01-11 : L5F T95I D253G E484K D614G A701V  
EPI\_ISL\_886240, USA/NJ-CDC-LC0003405/2021-01-11 : L5F T95I D253G D614G A701V  
EPI\_ISL\_884055, USA/NY-Wadsworth-21005245-01/2021-01-11 : L5F T95I D253G S477N D614G A701V  
EPI\_ISL\_886384, USA/GA-CDC-LC0003561/2021-01-11 : L5F T95I D253G E484K D614G A701V  
EPI\_ISL\_886270, USA/DE-CDC-LC0003883/2021-01-12 : L5F T95I D253G D614G A701V  
EPI\_ISL\_936267, USA/NY-Wadsworth-21012072-01/2021-01-13 : L5F T95I D253G D614G A701V  
EPI\_ISL\_936292, USA/NY-Wadsworth-21012249-01/2021-01-14 : L5F T95I D253G E484K D614G A701V  
EPI\_ISL\_936261, USA/NY-Wadsworth-21012065-01/2021-01-14 : L5F T95I D253G E484K D614G A701V  
EPI\_ISL\_883338, USA/NY-NYCPHL-002433/2021-01-14 : L5F T95I D253G E484K D614G A701V  
EPI\_ISL\_883342, USA/NY-NYCPHL-002473/2021-01-14 : L5F T95I D253G V483F E484K D614G A701V  
EPI\_ISL\_883339, USA/NY-NYCPHL-002440/2021-01-14 : L5F T95I D253G S477N D614G A701V  
EPI\_ISL\_883340, USA/NY-NYCPHL-002466/2021-01-14 : L5F T95I D253G V483F E484K D614G A701V  
EPI\_ISL\_936288, USA/NY-Wadsworth-21012244-01/2021-01-14 : L5F T95I D253G E484K D614G A701V  
EPI\_ISL\_883343, USA/NY-NYCPHL-002474/2021-01-14 : L5F T95I D253G V483F E484K D614G A701V  
EPI\_ISL\_883346, USA/NY-NYCPHL-002525/2021-01-14 : L5F T95I D253G S477N D614G A701V  
EPI\_ISL\_883341, USA/NY-NYCPHL-002471/2021-01-14 : L5F T95I D253G E484K D614G A701V  
EPI\_ISL\_883330, USA/NY-NYCPHL-002514/2021-01-15 : L5F T95I D253G S477N D614G Q957R  
EPI\_ISL\_883347, USA/NY-NYCPHL-002533/2021-01-15 : L5F T95I D253G S477N D614G A701V  
EPI\_ISL\_936299, USA/NY-Wadsworth-21012257-01/2021-01-15 : L5F T95I D253G S477N D614G Q957R  
EPI\_ISL\_883331, USA/NY-NYCPHL-002535/2021-01-15 : L5F T95I D253G S477N D614G A701V  
EPI\_ISL\_937272, USA/NY-NYCPHL-002846/2021-01-15 : L5F T95I D253G E484K D614G A701V  
EPI\_ISL\_936281, USA/NY-Wadsworth-21012236-01/2021-01-15 : L5F T95I D253G D614G A701V  
EPI\_ISL\_883344, USA/NY-NYCPHL-002520/2021-01-16 : L5F T95I D253G S477N D614G A701V  
EPI\_ISL\_937190, USA/NY-NYCPHL-002680/2021-01-17 : L5F T95I D253G E484K D614G A701V  
EPI\_ISL\_883345, USA/NY-NYCPHL-002521/2021-01-17 : L5F T95I D253G E484K D614G A701V



EPI\_ISL\_936248, USA/NY-Wadsworth-21011901-01/2021-01-17 : L5F T95I D253G E484K D614G A701V  
EPI\_ISL\_936271, USA/NY-Wadsworth-21012077-01/2021-01-17 : L5F T95I D253G S477N D614G Q957R  
EPI\_ISL\_936256, USA/NY-Wadsworth-21012058-01/2021-01-18 : L5F T95I D253G S477N D614G Q957R  
EPI\_ISL\_936254, USA/NY-Wadsworth-21011909-01/2021-01-18 : L5F T95I D253G E484K D614G A701V  
EPI\_ISL\_936291, USA/NY-Wadsworth-21012248-01/2021-01-18 : L5F T95I D253G E484K D614G A701V  
EPI\_ISL\_896233, USA/NY-Wadsworth-21011134-01/2021-01-18 : L5F T95I D253G E484K D614G A701V  
EPI\_ISL\_937191, USA/NY-NYCPHL-002681/2021-01-18 : L5F T95I D253G E484K D614G A701V  
EPI\_ISL\_936276, USA/NY-Wadsworth-21012089-01/2021-01-19 : L5F T95I D253G S477N D614G Q957R  
EPI\_ISL\_937126, USA/NY-NYCPHL-002548/2021-01-19 : L5F T95I D253G S477N D614G A701V  
EPI\_ISL\_937192, USA/NY-NYCPHL-002682/2021-01-20 : L5F T95I D253G E484K D614G A701V  
EPI\_ISL\_937176, USA/NY-NYCPHL-002659/2021-01-21 : L5F T33I T95I D253G D614G A701V  
EPI\_ISL\_920158, England/LOND-12F79EE/2021-01-21 : L5F T95I D253G D614G A701V  
EPI\_ISL\_962431, USA/WA-S4338/2021-01-21 : L5F T95I D253G D614G A701V  
EPI\_ISL\_937205, USA/NY-NYCPHL-002704/2021-01-22 : L5F T95I D253G S477N D614G Q957R  
EPI\_ISL\_937211, USA/NY-NYCPHL-002711/2021-01-22 : L5F T95I D253G E484K D614G A701V  
EPI\_ISL\_937201, USA/NY-NYCPHL-002698/2021-01-22 : L5F T95I D253G D614G A701V  
EPI\_ISL\_937213, USA/NY-NYCPHL-002714/2021-01-22 : L5F L18F T95I D253G S477N D614G Q957R  
EPI\_ISL\_937246, USA/NY-NYCPHL-002784/2021-01-22 : L5F T95I D253G E484K D614G A701V  
EPI\_ISL\_937247, USA/NY-NYCPHL-002785/2021-01-23 : L5F T95I D253G E484K D614G A701V  
EPI\_ISL\_937258, USA/NY-NYCPHL-002831/2021-01-24 : L5F T95I D253G E484K D614G A701V  
EPI\_ISL\_937258, USA/NY-NYCPHL-002831/2021-01-24 : L5F T95I D253G E484K D614G A701V  
EPI\_ISL\_937236, USA/NY-NYCPHL-002767/2021-01-25 : L5F T95I D253G S477N D614G A701V  
EPI\_ISL\_937218, USA/NY-NYCPHL-002729/2021-01-25 : L5F T95I D253G E484K D614G A701V  
EPI\_ISL\_937216, USA/NY-NYCPHL-002723/2021-01-25 : L5F T95I D253G E484K D614G A701V  
EPI\_ISL\_937265, USA/NY-NYCPHL-002839/2021-01-25 : L5F T95I D253G E484K D614G A701V  
EPI\_ISL\_937215, USA/NY-NYCPHL-002720/2021-01-25 : L5F T95I D253G E484K D614G A701V  
EPI\_ISL\_937255, USA/NY-NYCPHL-002793/2021-01-25 : L5F T95I D253G E484K D614G A701V  
EPI\_ISL\_906839, Singapore/117/2021-01-26 : L5F T95I D253G E484K D614G A701V  
EPI\_ISL\_906838, Singapore/116/2021-01-26 : L5F T95I D253G E484K D614G A701V  
EPI\_ISL\_906837, Singapore/115/2021-01-26 : L5F T95I D253G E484K D614G A701V  
EPI\_ISL\_937477, USA/ME-HETL-J1185/2021-01-29 : L5F T95I D253G E484K D614G A701V

Supplementary Table 2. Individual vaccinee characteristics and plasma titers

| Participant ID | Demographic characteristics |        |        |              | Vaccination details |                     |                     |                       |                       | Neutralization titer (reciprocal dilution) NT50 |       |              |       |              |       |
|----------------|-----------------------------|--------|--------|--------------|---------------------|---------------------|---------------------|-----------------------|-----------------------|-------------------------------------------------|-------|--------------|-------|--------------|-------|
|                | Age range (years)           | Sex    | Race § | Ethnicity    | Vaccine platform    | # of doses received | Time between (days) |                       |                       | Experiment 1                                    |       | Experiment 2 |       | Experiment 3 |       |
|                |                             |        |        |              |                     |                     | 1st & 2nd dose      | 1st dose & blood draw | 2nd dose & blood draw | B.1.526 v.1†                                    | D614G | B.1.526 v.2‡ | D614G | B.1.351*     | D614G |
| MOD1           | 50-59                       | Male   | W      | Hispanic     | Moderna             | 2                   | 28                  | 74                    | 46                    | 364                                             | 2176  | 497          | 917   | 64           | 630   |
| MOD2           | 30-39                       | Male   | W      | Non-Hispanic | Moderna             | 2                   | 34                  | 62                    | 28                    | 265                                             | 975   | 205          | 573   | 41           | 447   |
| MOD3           | 30-39                       | Male   | W      | Non-Hispanic | Moderna             | 2                   | 31                  | 78                    | 47                    | 269                                             | 1412  | 460          | 1762  | 107          | 744   |
| MOD6           | 40-49                       | Female | W      | Non-Hispanic | Moderna             | 2                   | 28                  | 89                    | 61                    | 223                                             | 679   | 201          | 983   | 57           | 454   |
| MOD7           | 60-69                       | Male   | A      | Non-Hispanic | Moderna             | 2                   | 35                  | 84                    | 49                    | 563                                             | 2412  | 746          | 2981  | 122          | 927   |
| MOD8           | 60-69                       | Female | W      | Non-Hispanic | Moderna             | 2                   | 35                  | 96                    | 63                    | 214                                             | 1713  | 381          | 1660  | 83           | 1203  |
| PFZ12          | 50-59                       | Female | W      | Non-Hispanic | Pfizer/BioNTech     | 2                   | 21                  | 83                    | 62                    | 345                                             | 1516  | 733          | 1278  | 36           | 857   |
| PFZ16          | 60-69                       | Female | W      | Non-Hispanic | Pfizer/BioNTech     | 2                   | 22                  | 119                   | 97                    | 109                                             | 566   | 188          | 718   | 139          | 639   |
| C001           | 30-39                       | Female | W      | Non-Hispanic | Pfizer/BioNTech     | 2                   | 22                  | 57                    | 35                    | 884                                             | 2652  | 1035         | 1738  | 129          | 1726  |
| C004           | 30-39                       | Male   | W      | Non-Hispanic | Pfizer/BioNTech     | 2                   | 21                  | 91                    | 70                    | 254                                             | 1603  | 860          | 1991  | 258          | 1023  |

§ = White (W); Asian (A)

† = B.1.516 v.1 spike mutations L5F, T95I, D253G, E484K, D614G, and A701V

‡ = B.1.526 v.2 spike mutations: L5F, T95I, D253G, S477N, D614G, and Q957R

\* = B.1.351 spike mutations: L18F D80A D215G Δ242-244 R246I K417N E484K N501Y D614G A701V

Characteristics from Supplementary Table 1 of Wang, et al., "mRNA vaccine-elicited antibodies to SARS-CoV-2 and circulating variants", Nature (2021)

Supplementary Table 3. Individual convalescent participant characteristics and plasma titers

| ID   | Age range (years) | Sex | Race  | Ethnicity    | Temporal dynamics (days)         |                                |                                  |                     | # of solicited comorbidities § | Acute disease severity by WHO (0-8) ¶ | Post-acute Sx persistence # | Neutralization titer (reciprocal dilution) NT50 |       |              |       |                           |       |              |       |
|------|-------------------|-----|-------|--------------|----------------------------------|--------------------------------|----------------------------------|---------------------|--------------------------------|---------------------------------------|-----------------------------|-------------------------------------------------|-------|--------------|-------|---------------------------|-------|--------------|-------|
|      |                   |     |       |              | Sx duration during acute disease | Sx onset to initial visit (T1) | Sx onset to follow-up visit (T2) | Time between visits |                                |                                       |                             | Timepoint T1 - 1.3 months                       |       |              |       | Timepoint T2 - 6.2 months |       |              |       |
|      |                   |     |       |              |                                  |                                |                                  |                     |                                |                                       |                             | Experiment 1                                    |       | Experiment 2 |       | Experiment 1              |       | Experiment 2 |       |
|      |                   |     |       |              |                                  |                                |                                  |                     |                                |                                       |                             | B.1.526 v.1†                                    | D614G | B.1.526 v.2‡ | D614G | B.1.526 v.1†              | D614G | B.1.526 v.2‡ | D614G |
| 38   | 50-59             | F   | White | Non-Hispanic | 10                               | 38                             | 211                              | 173                 | 0                              | 2                                     | N                           | 27                                              | 148   | 255          | 385   | 154                       | 891   | 775          | 2597  |
| 40   | 40-49             | M   | White | Non-Hispanic | 7                                | 23                             | 195                              | 172                 | 0                              | 2                                     | N                           | 13                                              | 37    | 72           | 90    | N.N.                      | 10    | N.N.         | N.N.  |
| 76   | 40-49             | F   | White | Non-Hispanic | 28                               | 34                             | 204                              | 170                 | 0                              | 1                                     | Y                           | 33                                              | 105   | 105          | 184   | 10                        | 23    | 13           | 24    |
| 99   | 30-39             | F   | White | Non-Hispanic | 13                               | 29                             | 204                              | 175                 | 0                              | 2                                     | N                           | 180                                             | 973   | 794          | 1055  | 22                        | 358   | 176          | 240   |
| 233  | 50-59             | M   | White | Non-Hispanic | 20                               | 41                             | 206                              | 165                 | 0                              | 2                                     | N                           | 55                                              | 194   | 108          | 165   | 19                        | 50    | 17           | 46    |
| 328  | 50-59             | F   | White | Non-Hispanic | 22                               | 62                             | 203                              | 141                 | 0                              | 2                                     | N                           | 24                                              | 347   | 50           | 131   | 22                        | 135   | 29           | 77    |
| 352  | 40-49             | M   | White | Non-Hispanic | 16                               | 43                             | 197                              | 154                 | 0                              | 2                                     | N                           | 129                                             | 1684  | 587          | 744   | 27                        | 148   | 40           | 107   |
| 403* | 50-59             | M   | Asian | Non-Hispanic | 18                               | 39                             | 174                              | 135                 | 1                              | 4                                     | Y                           | 555                                             | 3223  | 1067         | 2433  | 89                        | 463   | 45           | 183   |
| 437  | 40-49             | F   | Asian | Non-Hispanic | 14                               | 34                             | 192                              | 158                 | 1                              | 2                                     | N                           | 122                                             | 525   | 276          | 996   | 56                        | 132   | 65           | 270   |
| 537  | 50-59             | M   | White | Non-Hispanic | 15                               | 45                             | 178                              | 133                 | 2                              | 2                                     | Y                           | 650                                             | 3528  | 1610         | 4291  | 240                       | 853   | 334          | 957   |

Sx = symptoms, N.N = non-neutralizing

\* = hospitalized

§ = Arterial hypertension (HTN), obesity (OB), diabetes mellitus (DM), asthma (A), chronic obstructive pulmonary disease (COPD), coronary artery disease (CAD), cancer (CX)

¶ = WHO Ordinal Scale for Clinical Improvement, COVID-19 Trial Design Synopsis

# = Persistent fatigue, dyspnea, athletic deficit, or ≥ 3 other solicited symptoms beyond 6 weeks from Sx onset

† = B.1.516 v.1 spike mutations L5F, T95I, D253G, E484K, D614G, and A701V

‡ = B.1.526 v.2 spike mutations: L5F, T95I, D253G, S477N, D614G, and Q957R

Characteristics from Supplementary Table 2 of Gaebler, et al., "Evolution of antibody immunity to SARS-CoV-2" Nature 591, 639–644 (2021)

**Supplementary Table 4. Monoclonal antibody neutralization of B.1.526**

| <b>Antibody</b>      | <b>Antibody Class*</b> | <b>Neutralization IC50 (<math>\mu\text{g/mL}</math>)</b> |              |
|----------------------|------------------------|----------------------------------------------------------|--------------|
|                      |                        | <b>B.1.526 v.1†</b>                                      | <b>D614G</b> |
| C105 <sup>a</sup>    | 1                      | 0.112                                                    | 0.035        |
| C002 <sup>a</sup>    | 2                      | 53                                                       | 0.006        |
| BG10-19 <sup>b</sup> | 3                      | 0.008                                                    | 0.004        |
| BG7-15 <sup>b</sup>  | 2/3                    | 0.0002                                                   | 0.002        |

a = Robbiani, D.F. et al. "Convergent antibody responses to SARS-CoV-2 in convalescent individuals" Nature 584, 437–442 (2020)

b = Schied, J.F. et al. "B cell genomics behind cross-neutralization of SARS-CoV-2 variants and SARS-CoV" Cell April 24 (2021)

\* = Barnes, C.O. et al. "SARS-CoV-2 neutralizing antibody structures inform therapeutic strategies" Nature 588, 682–687 (2020)

† = B.1.516 v.1 spike mutations L5F, T95I, D253G, E484K, D614G, and A701V

Supplementary Table 5.

List of primers used to make B.1.526 v.1 and v.2 pseudovirus constructs

| Primer Name | Sequence                                   |
|-------------|--------------------------------------------|
| L5F_1       | GCCACCATGTTTCGTGTTCTTCGTA                  |
| L5F_2       | CACCAAAGGAAGGAGTACGAAGAACACGAACATGGTGGC    |
| T95I_1      | GGAGTGTACTTCGCGTCCATCGAGAAGAGCAATATCATTC   |
| T95I_2      | GAATGATATTGCTCTTCTCGATGGACGCGAAGTACTCC     |
| D253G_1     | CTGACACCGGGCGGCTCAAGTCCGGA                 |
| D253G_2     | TCCGGAACCTTGAGCCGCCCGGTGTCAG               |
| S477N_1     | GGAGATATATCAAGCCGGCAATACACCATGTAATGGTGTG   |
| S477N_2     | CACACCATTACATGGTGTATTGCCGGCTTGATATATCTCC   |
| E484K_1     | CACCATGTAATGGTGTGAAGGGCTTAACTGCTAC         |
| E484K_2     | GTAGCAGTTAAAGCCCTTACACCATTACATGGTG         |
| A701V_1     | CGATGAGCCTCGGAGTGGAGAACAGCGTCGCG           |
| A701V_2     | CGCGACGCTGTTCTCCACTCCGAGGCTCATCG           |
| Q957R_1     | CGTGGTGAATCAGAATGCACGGGCACTGAATACCTTGGTTAA |
| Q957R_2     | TTAACCAAGGTATTCAGTGCCCGTGCATTCTGATTCACCACG |
