# Supplementary material for: Detection and characterization of the SARS-CoV-2 lineage B.1.526 in New York
Source: PubMed Central journal article supplement (PMC8352861; doi:10.1038/s41467-021-25168-4), 2021-08-09
Supplement: 41467_2021_25168_MOESM4_ESM.pdf [file 41467_2021_25168_MOESM4_ESM.pdf]

## **Description of Additional Supplementary Files**

File Name: Supplementary Data 1

Description: List of SARS-CoV-2 genomes with GenBank accession numbers

File Name: Supplementary Data 2

Description: List of SARS-CoV-2 genomes used in phylogenetic and phylodynamic analyses

File Name: Supplementary Data 3

Description: List of SARS-CoV-2 genomes used in mapping Fig. 4

File Name: Supplementary Data 4

Description: GISAID Contributors Acknowledgements
